# Supplementary material for: Impact of a Plasmodium falciparum AMA1 Vaccine on Antibody Responses in Adult Malians
Source: PLOS journal article supplement (doi:10.1371/journal.pone.0001045), 2007-10-17
Supplement: S1 (10.1371/journal.pone.0001045.s001) [file journal.pone.0001045.s001]

# CONSORT Checklist of items to include when reporting a randomized trial

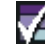

| PAPER SECTION<br>And topic                    | Item | Description                                                                                                                                                                                                                                                                                                                                                 | Reported in Section                                                         |
|-----------------------------------------------|------|-------------------------------------------------------------------------------------------------------------------------------------------------------------------------------------------------------------------------------------------------------------------------------------------------------------------------------------------------------------|-----------------------------------------------------------------------------|
| <i>TITLE &amp;<br/>ABSTRACT</i>               | 1    | <u>How participants were allocated to interventions</u> (e.g., "random allocation", "randomized", or "randomly assigned").                                                                                                                                                                                                                                  | Abstract-Design and<br>Methods-<br>Randomization                            |
| <i>INTRODUCTION<br/>Background</i>            | 2    | <u>Scientific background and explanation of rationale.</u>                                                                                                                                                                                                                                                                                                  | Introduction                                                                |
| <i>METHODS<br/>Participants</i>               | 3    | <u>Eligibility criteria for participants</u> and the <u>settings and locations where the data were collected.</u>                                                                                                                                                                                                                                           | Abstract-<br>Setting/Participants<br>and Methods-Study<br>Site/Participants |
| Interventions                                 | 4    | <u>Precise details of the interventions intended for each group and how and when they were actually administered.</u>                                                                                                                                                                                                                                       | Abstract-<br>Interventions and<br>Methods-<br>Interventions                 |
| Objectives                                    | 5    | <u>Specific objectives and hypotheses.</u>                                                                                                                                                                                                                                                                                                                  | Abstract-Objectives<br>and Methods-<br>Objectives                           |
| Outcomes                                      | 6    | <u>Clearly defined primary and secondary outcome measures</u> and, when applicable, any <u>methods used to enhance the quality of measurements</u> (e.g., multiple observations, training of assessors).                                                                                                                                                    | Abstract-Outcome<br>Measures and<br>Methods-Outcomes                        |
| Sample size                                   | 7    | <u>How sample size was determined</u> and, when applicable, <u>explanation of any interim analyses and stopping rules.</u>                                                                                                                                                                                                                                  | Methods-Sample Size                                                         |
| Randomization --<br>Sequence<br>generation    | 8    | <u>Method used to generate the random allocation sequence, including details of any restrictions</u> (e.g., blocking, stratification)                                                                                                                                                                                                                       | Methods-<br>Randomization                                                   |
| Randomization --<br>Allocation<br>concealment | 9    | <u>Method used to implement the random allocation sequence</u> (e.g., numbered containers or central telephone), clarifying whether the sequence was concealed until interventions were assigned.                                                                                                                                                           | Methods-<br>Randomization                                                   |
| Randomization --<br>Implementation            | 10   | <u>Who generated the allocation sequence, who enrolled participants, and who assigned participants to their groups.</u>                                                                                                                                                                                                                                     | Methods-<br>Randomization                                                   |
| Blinding (masking)                            | 11   | <u>Whether or not participants, those administering the interventions, and those assessing the outcomes were blinded to group assignment.</u> If done, <u>how the success of blinding was evaluated.</u>                                                                                                                                                    | Methods-Blinding                                                            |
| Statistical methods                           | 12   | <u>Statistical methods used to compare groups for primary outcome(s); Methods for additional analyses,</u> such as subgroup analyses and adjusted analyses.                                                                                                                                                                                                 | Methods-Statistical<br>Methods                                              |
| RESULTS<br>Participant flow                   | 13   | <u>Flow of participants through each stage</u> (a diagram is strongly recommended). Specifically, for each group report the numbers of participants randomly assigned, receiving intended treatment, completing the study protocol, and analyzed for the primary outcome. <u>Describe protocol deviations from study as planned, together with reasons.</u> | Results-Participant<br>Flow & Baseline<br>Characteristics and<br>Figure 1   |
| Recruitment                                   | 14   | <u>Dates defining the periods of recruitment and follow-up.</u>                                                                                                                                                                                                                                                                                             | Results-Participant<br>Flow and Baseline<br>Characteristics                 |
|                                               |      |                                                                                                                                                                                                                                                                                                                                                             |                                                                             |

|                           |    |                                                                                                                                                                                                                       |                                                                                                                                                                 |
|---------------------------|----|-----------------------------------------------------------------------------------------------------------------------------------------------------------------------------------------------------------------------|-----------------------------------------------------------------------------------------------------------------------------------------------------------------|
| Baseline data             | 15 | <u>Baseline demographic and clinical characteristics of each group.</u>                                                                                                                                               | Results-Participant Flow and Baseline Characteristics                                                                                                           |
| Numbers analyzed          | 16 | <u>Number of participants (denominator) in each group included in each analysis and whether the analysis was by "intention-to-treat".</u> State the results in absolute numbers when feasible (e.g., 10/20, not 50%). | Results-Participant Flow and Baseline Characteristics                                                                                                           |
| Outcomes and estimation   | 17 | <u>For each primary and secondary outcome, a summary of results for each group, and the estimated effect size and its precision</u> (e.g., 95% confidence interval).                                                  | Abstract-Results, Results-Safety, Results-IgG responses to AMA1-3D7 and AMA1-FVO, Results- IgG responses to AMA1-L32, and Results-Growth inhibition assay (GIA) |
| Ancillary analyses        | 18 | <u>Address multiplicity by reporting any other analyses performed</u> , including subgroup analyses and adjusted analyses, indicating those pre-specified and those exploratory.                                      | n/a                                                                                                                                                             |
| Adverse events            | 19 | <u>All important adverse events or side effects in each intervention group.</u>                                                                                                                                       | Abstract-Results and Results-Safety                                                                                                                             |
| DISCUSSION Interpretation | 20 | <u>Interpretation of the results</u> , taking into account study hypotheses, sources of potential bias or imprecision and the dangers associated with multiplicity of analyses and outcomes.                          | Discussion-Interpretation                                                                                                                                       |
| Generalizability          | 21 | <u>Generalizability (external validity) of the trial findings.</u>                                                                                                                                                    | Discussion-Generalizability                                                                                                                                     |
| Overall evidence          | 22 | <u>General interpretation of the results in the context of current evidence.</u>                                                                                                                                      | Discussion-Overall evidence                                                                                                                                     |
